# Supplementary material
Source: Research Square preprint supplement (doi:10.21203/rs.3.rs-9448013/v1)

All the bands are numbered in sequence from top to bottom and from left to right.

**Figure 1E**

1. LRCH4

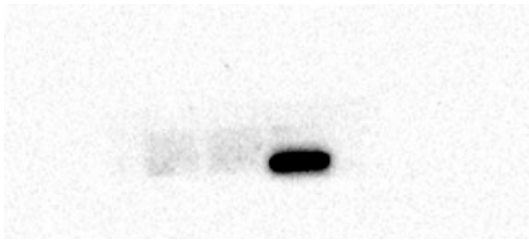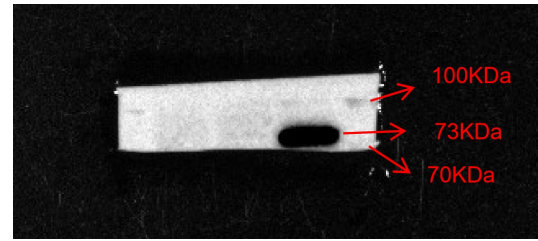

2. GAPDH

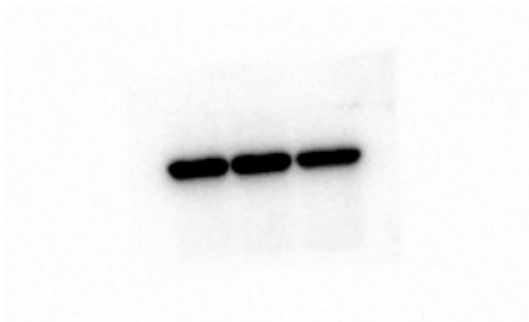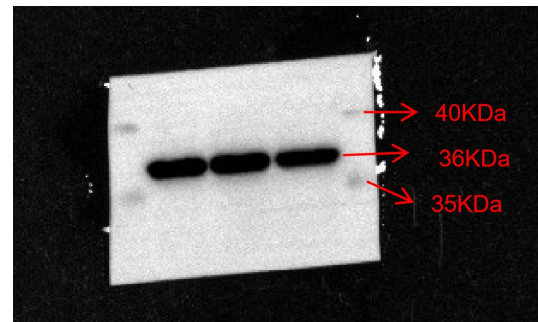

**Figure 2A**

1.LRCH4

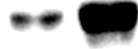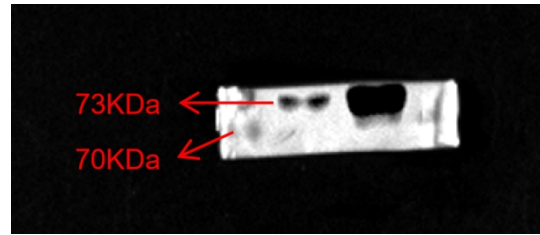

2.GAPDH

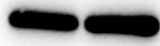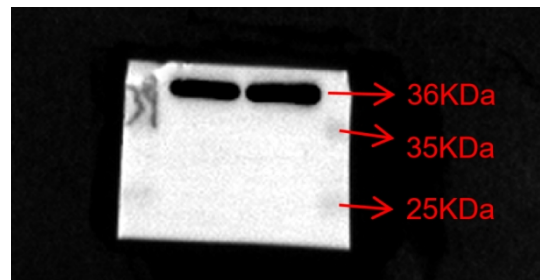

3.LRCH4

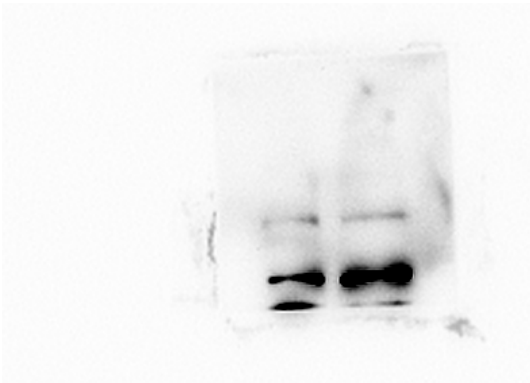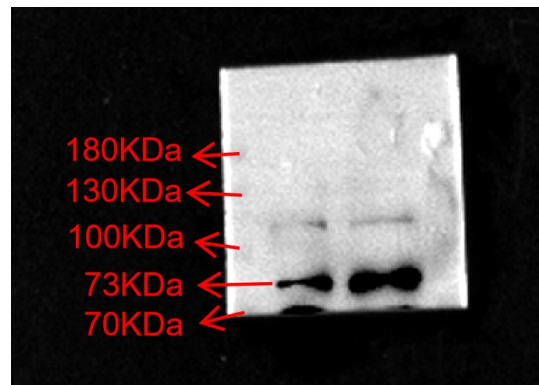

4.GAPDH

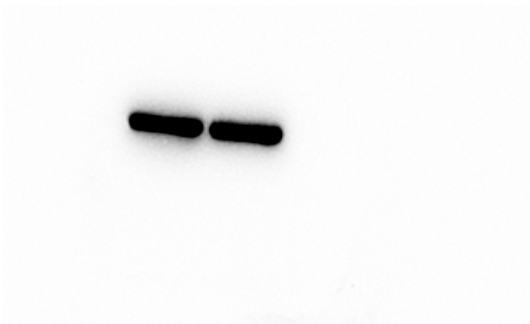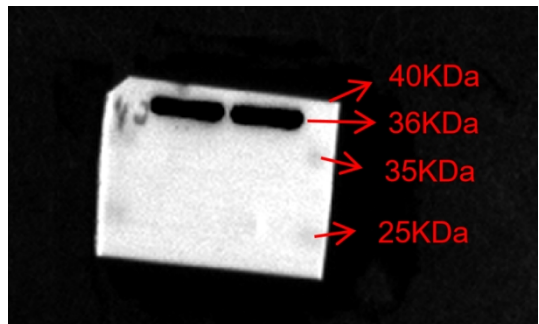

5.LRCH4

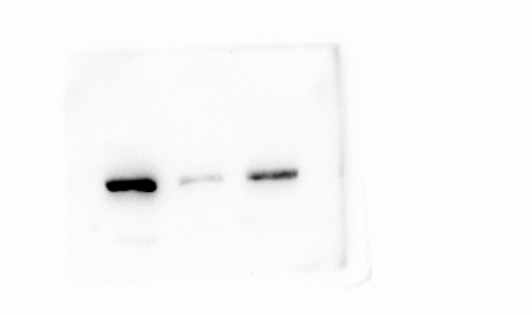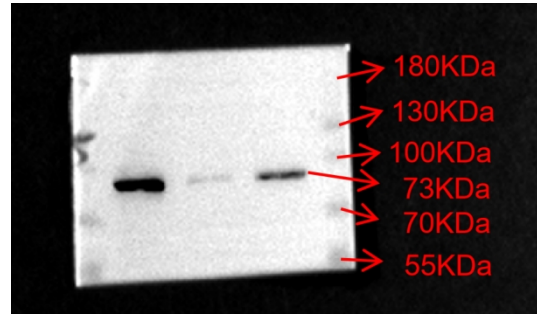

6.GAPDH

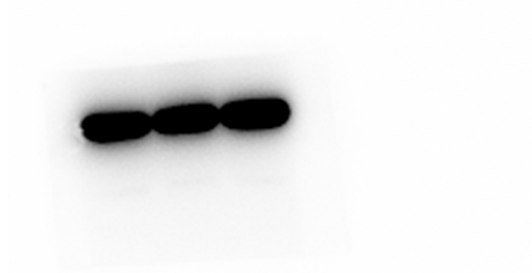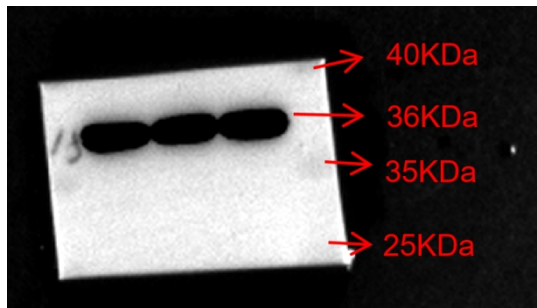

7.LRCH4

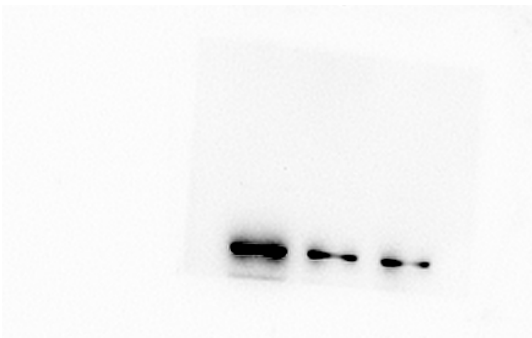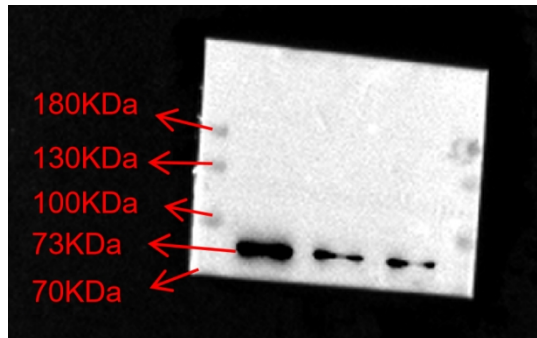

8.GAPDH

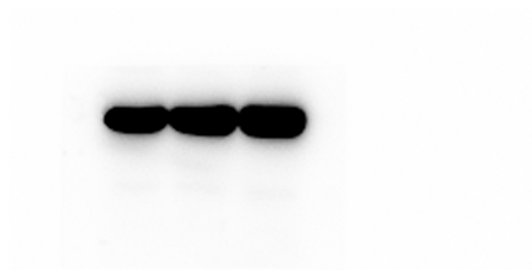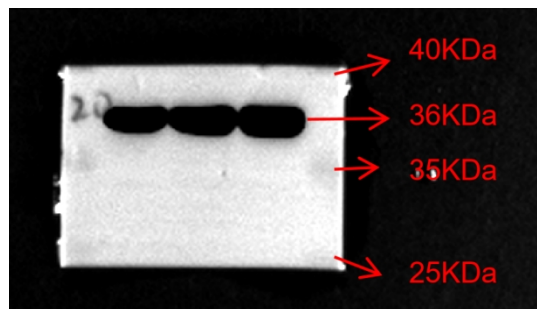

### Figure3D

1.Flag-LRCH4

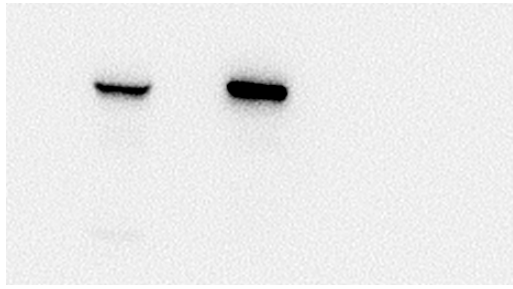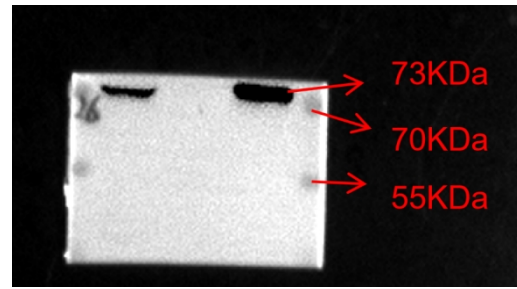

2.Myc-GSK3B

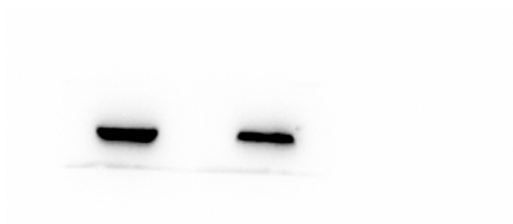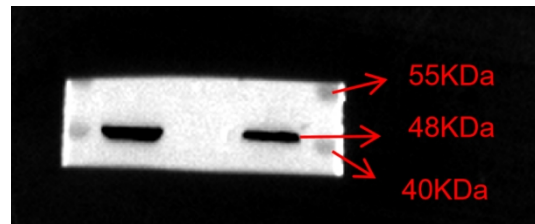

3.Flag-LRCH4

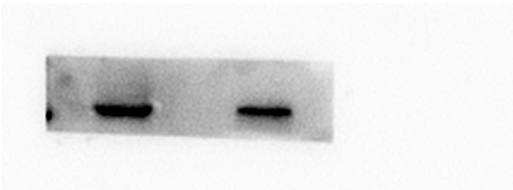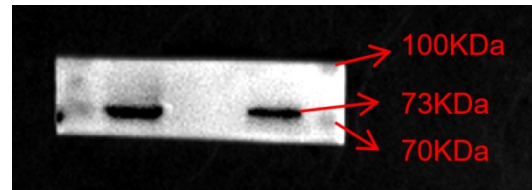

4.Myc-GSK3B

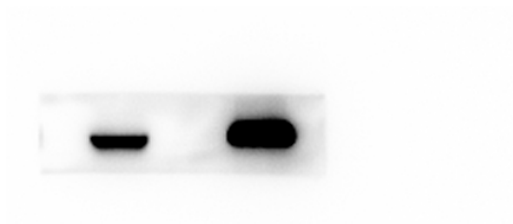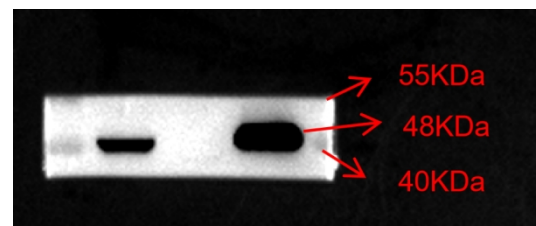

**Figure3E**

1.LRCH4

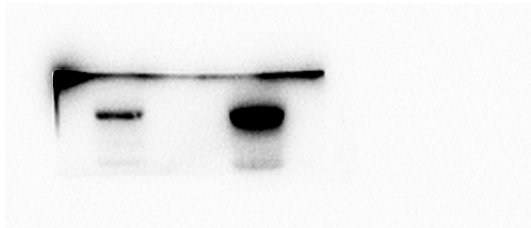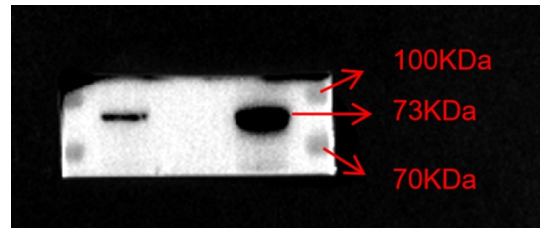

2.GSK3B

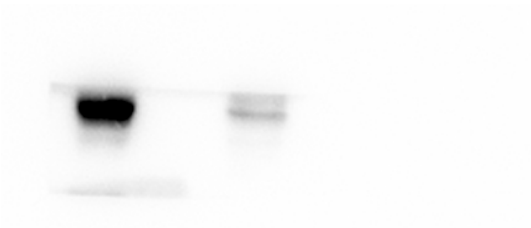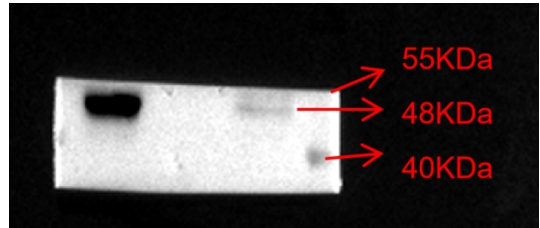

3.LRCH4

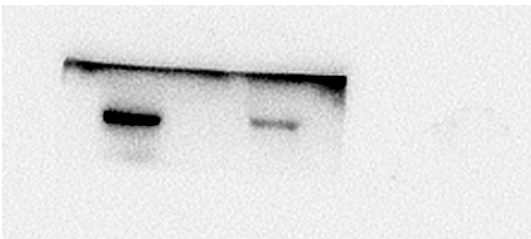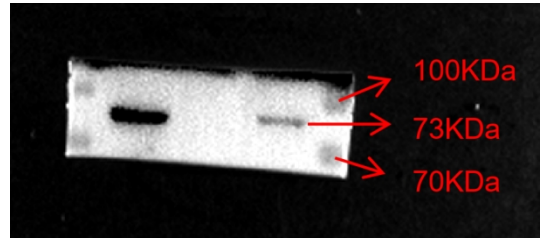

4.GSK3B

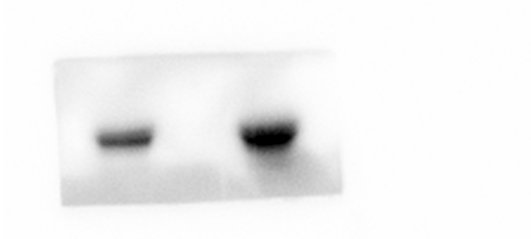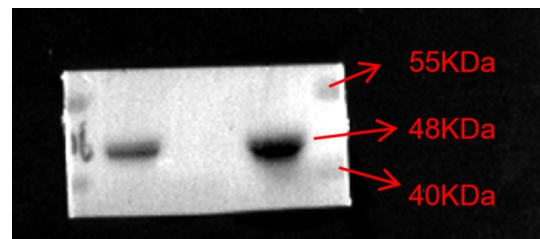

5.LRCH4

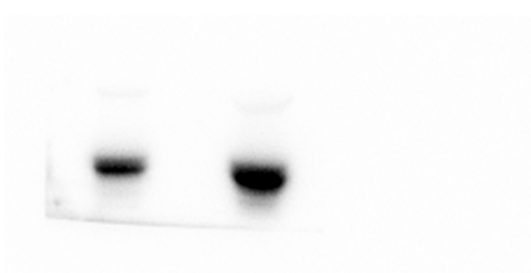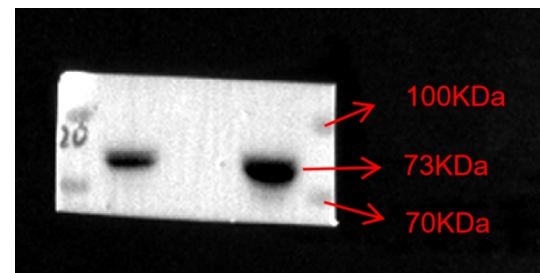

6.GSK3B

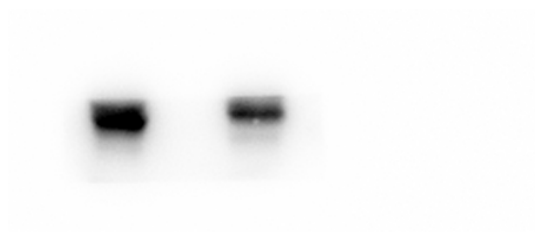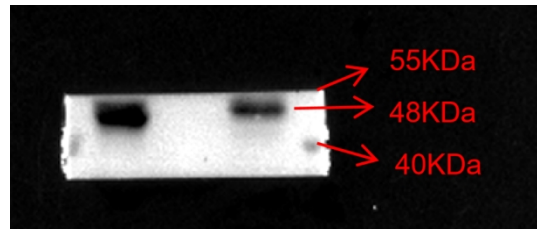

7.LRCH4

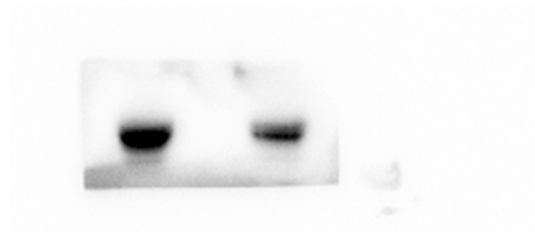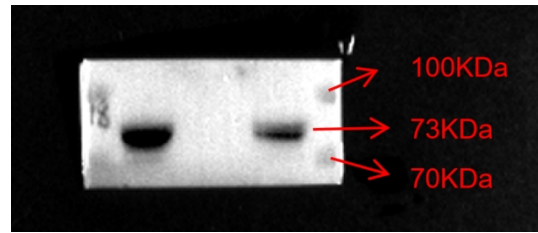

8.GSK3B

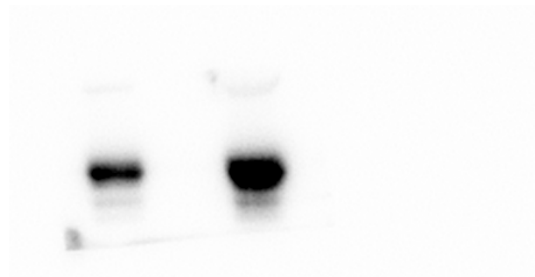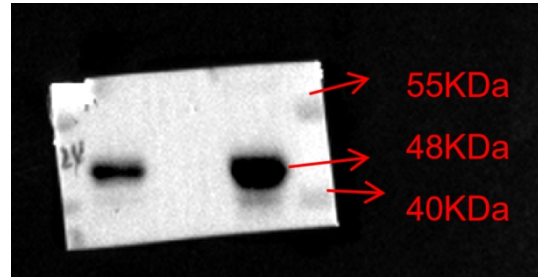

# Figure3F

1.LRCH4

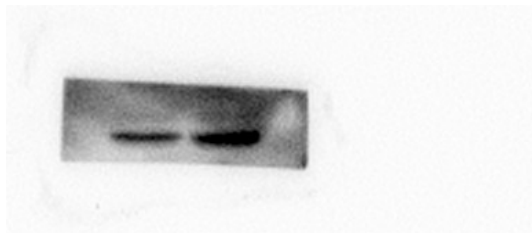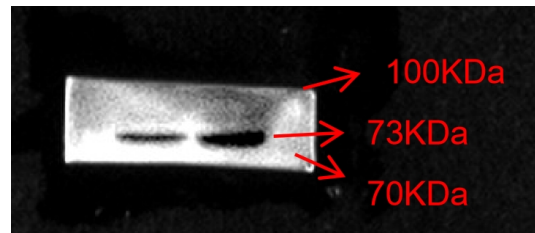

2.GSK3B

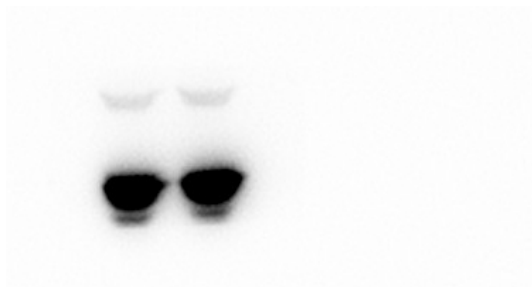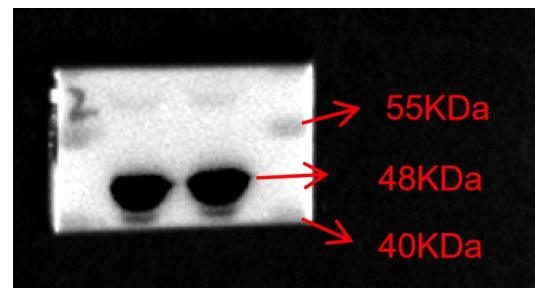

3.P-GSK3B

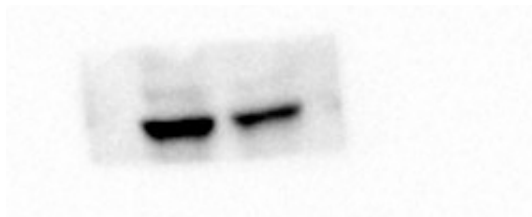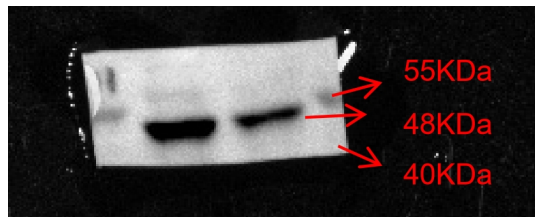

4.MEK

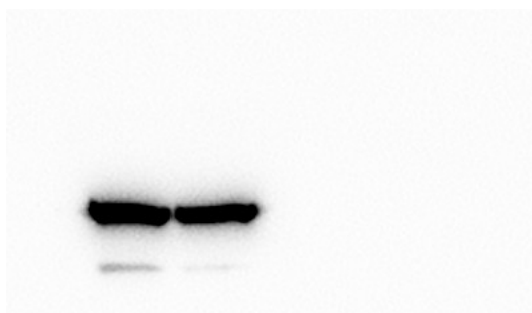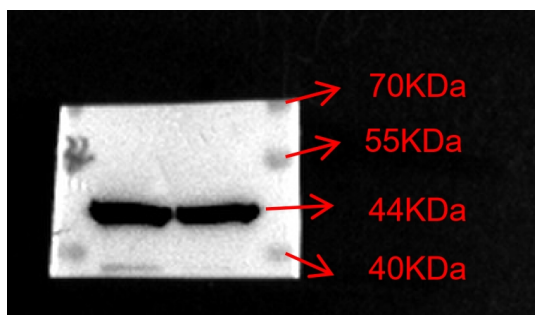

5.P-MEK

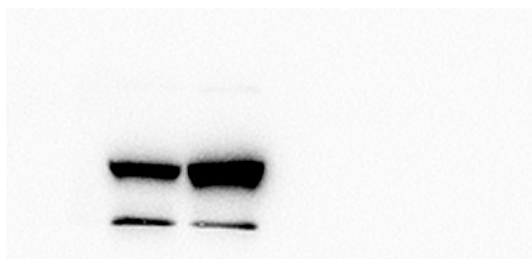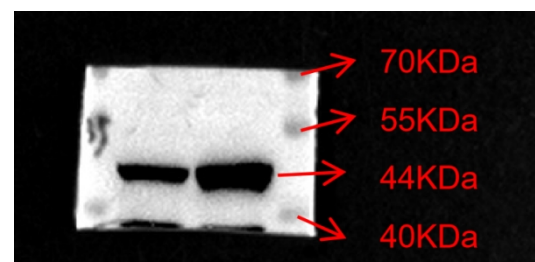

6.ERK

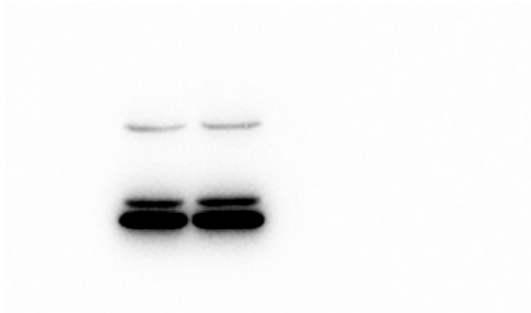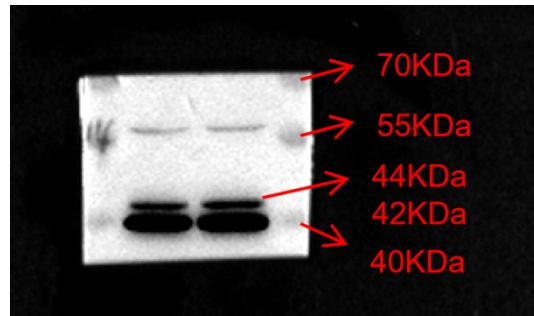

7.P-ERK

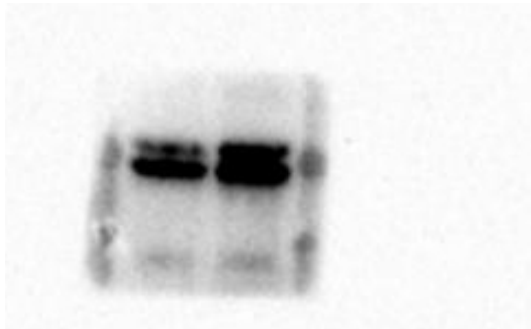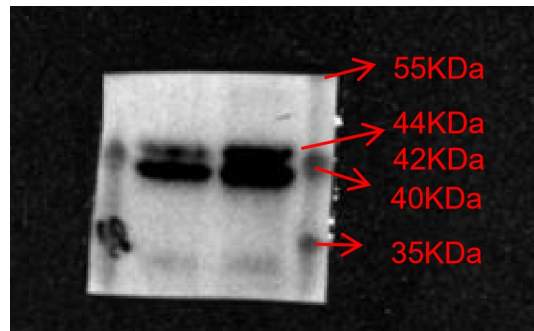

8.GAPDH

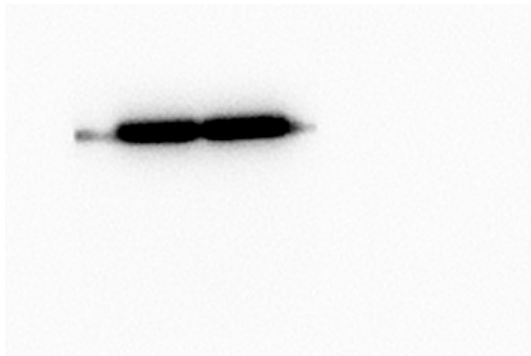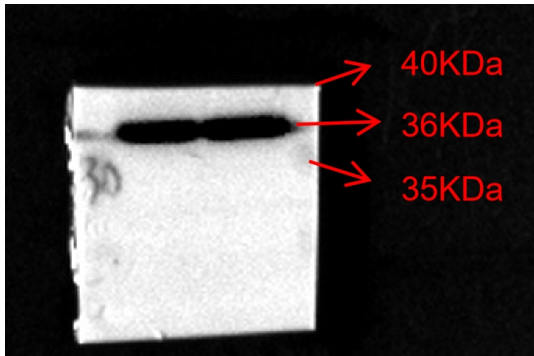

9.LRCH4

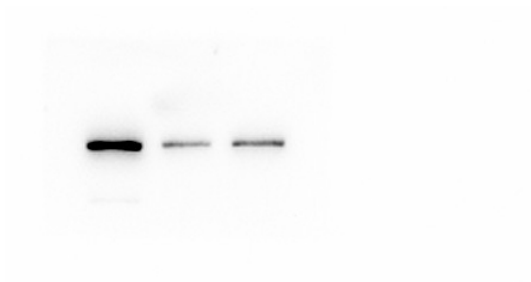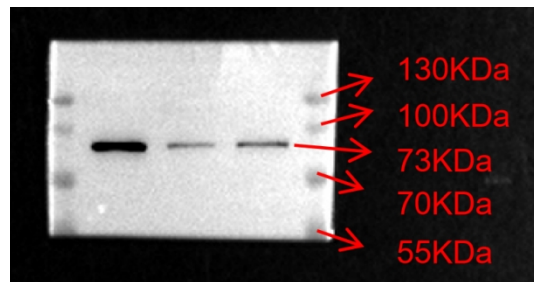

10.GSK3B

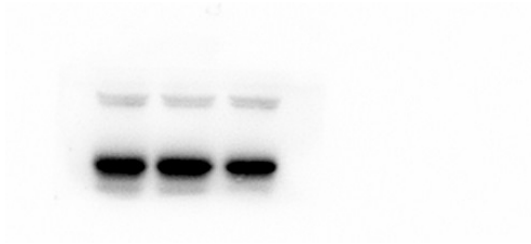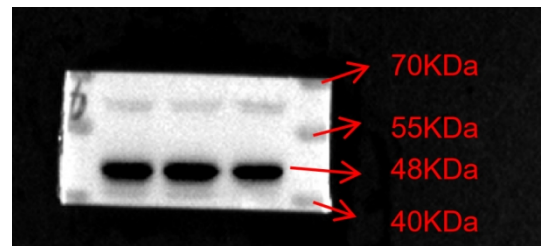

11.P-GSK3B

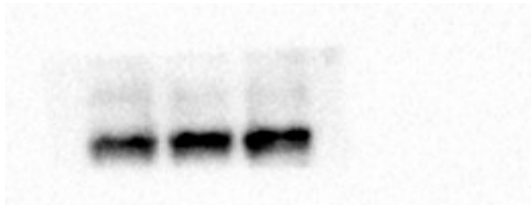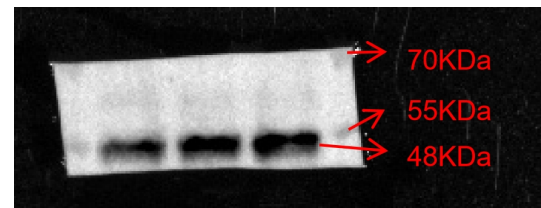

12.MEK

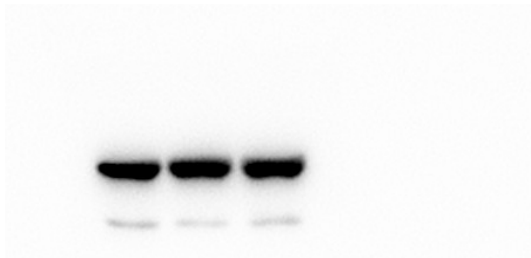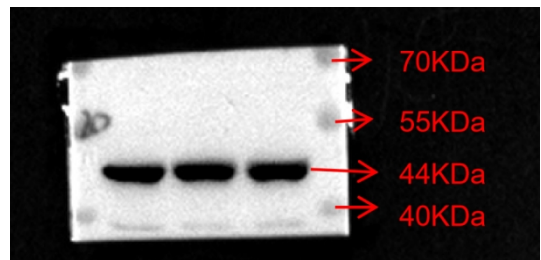

13.P-MEK

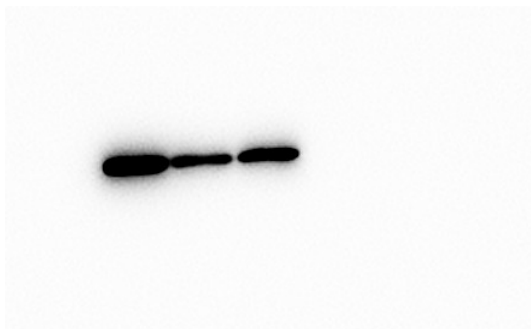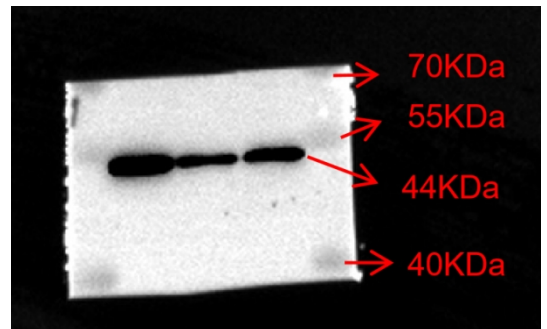

14.ERK

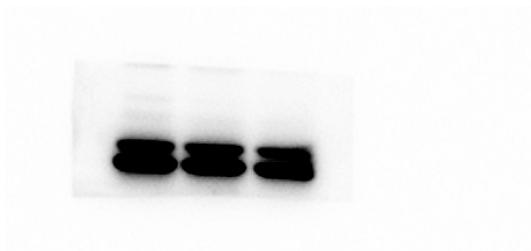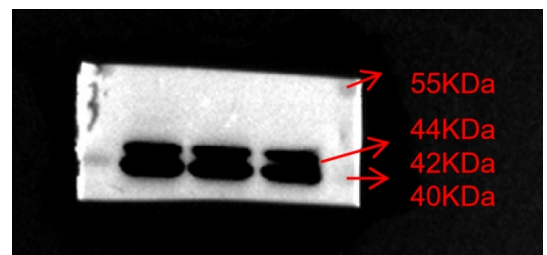

15.P-ERK

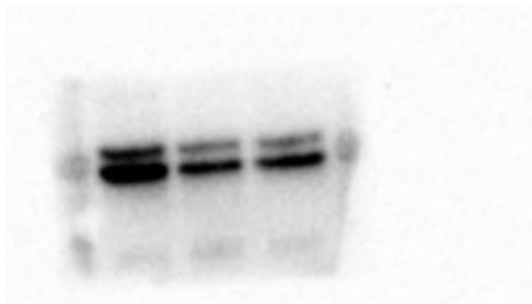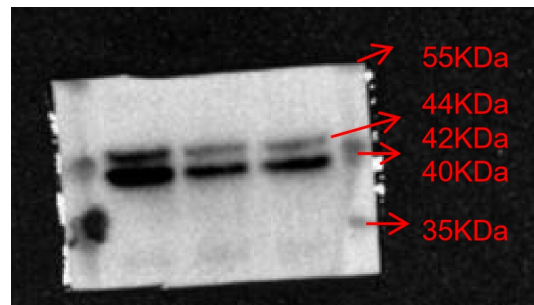

16.GAPDH

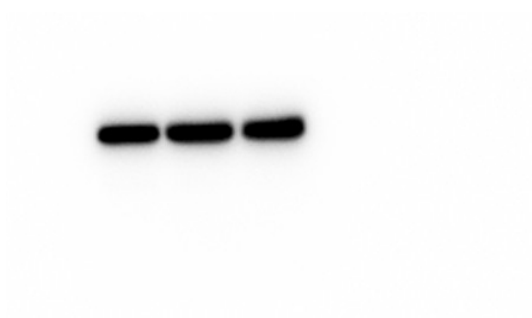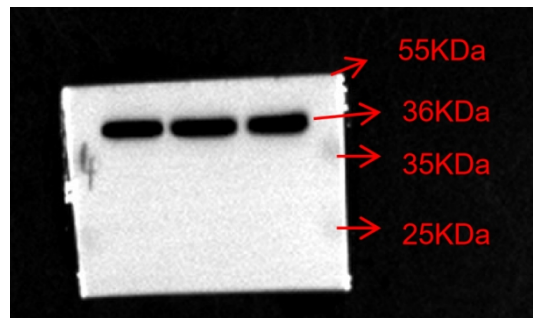

17.LRCH4

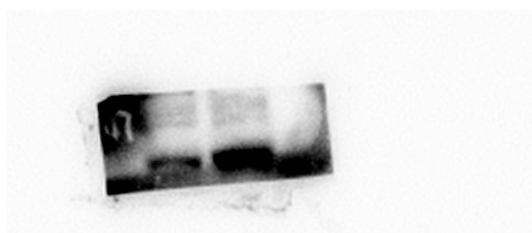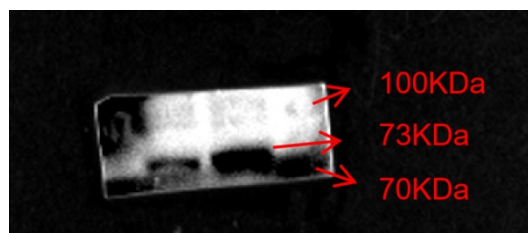

18.GSK3B

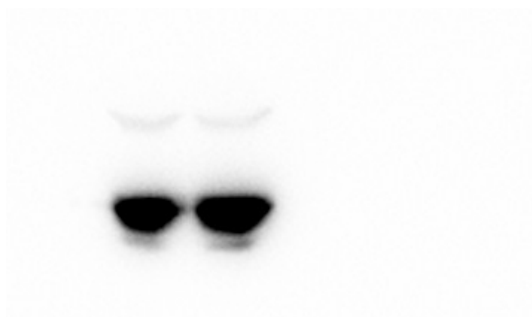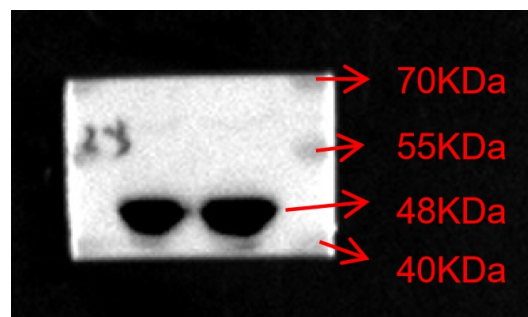

19.P-GSK3B

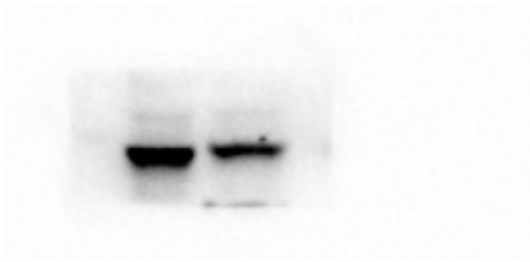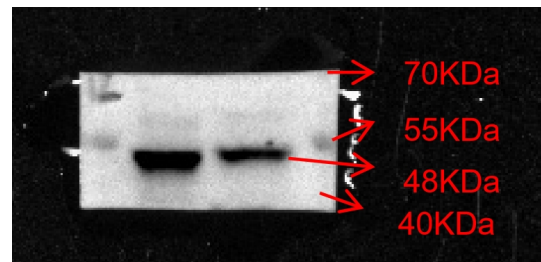

20.MEK

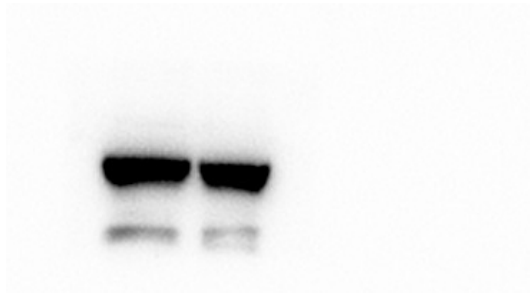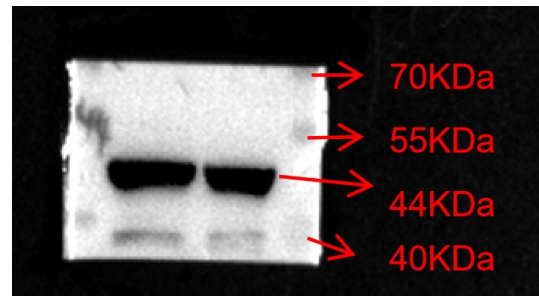

21.P-MEK

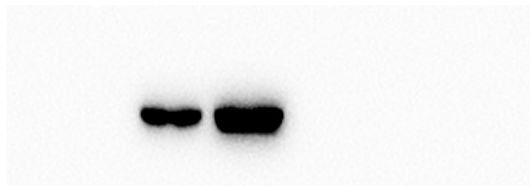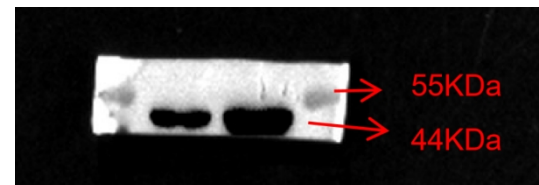

22.ERK

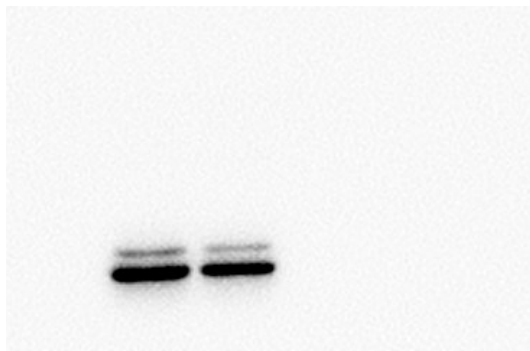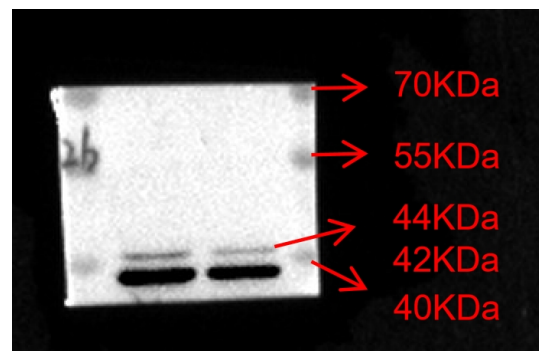

23.P-ERK

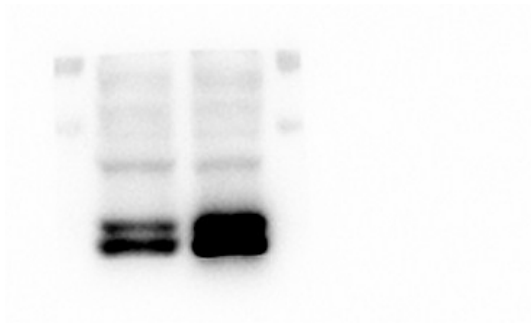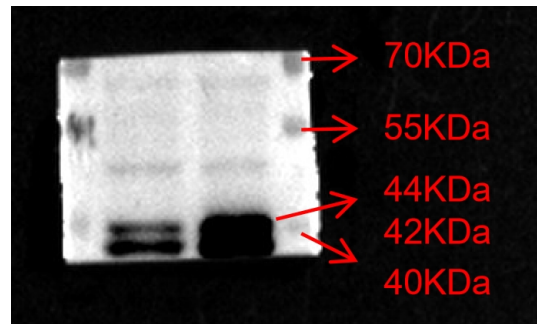

24.GAPDH

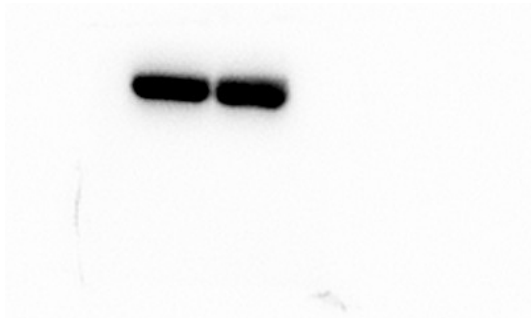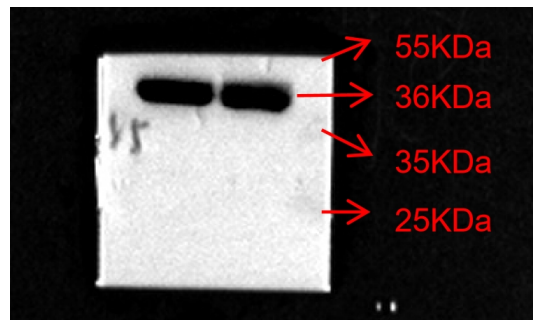

25.LRCH4

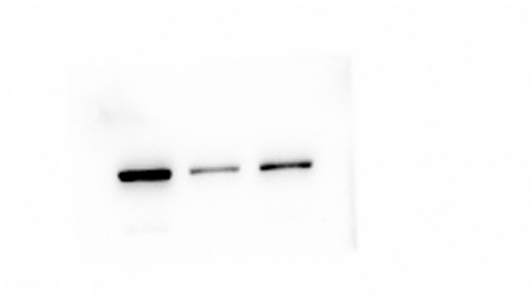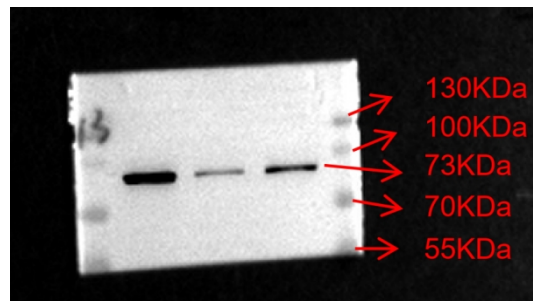

26.GSK3B

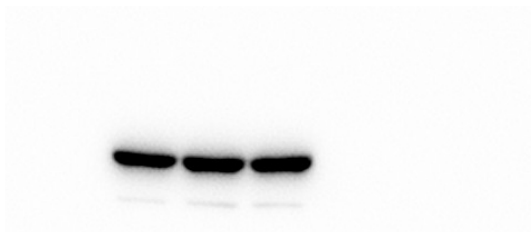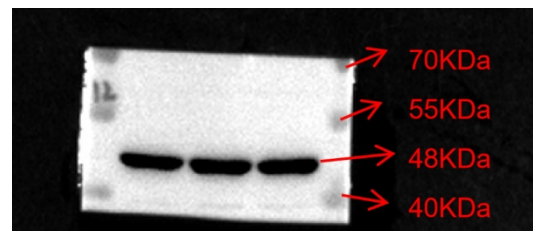

27.P-GSK3B

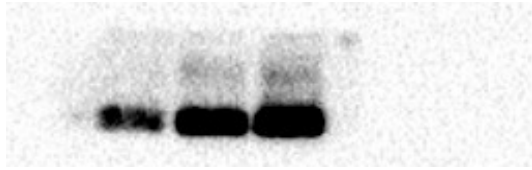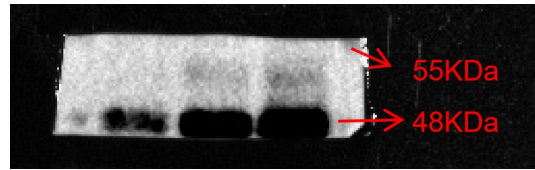

28.MEK

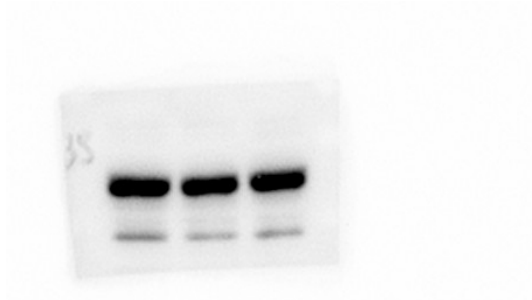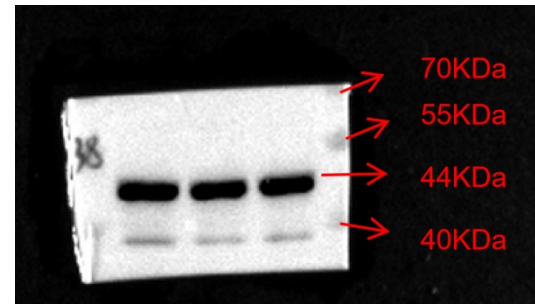

29.P-MEK

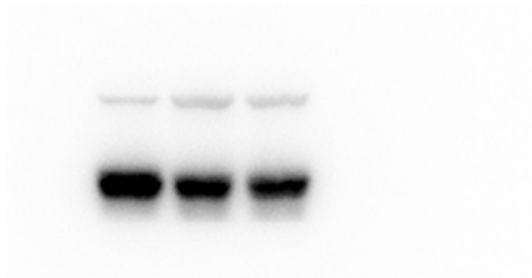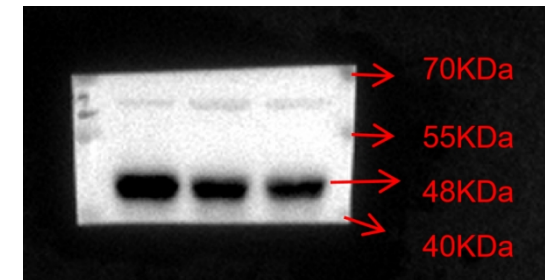

30.ERK

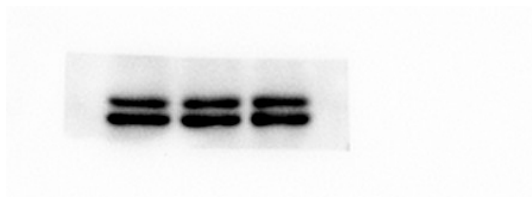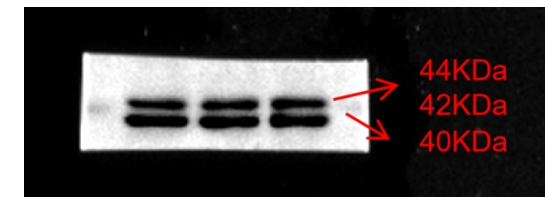

31.P-ERK

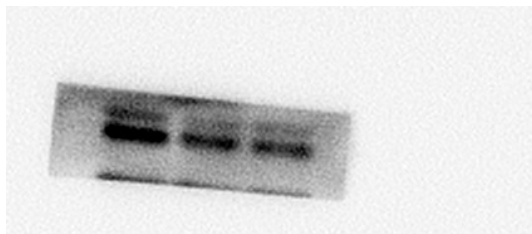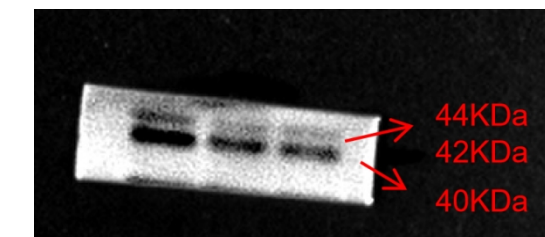

32.GAPDH

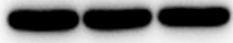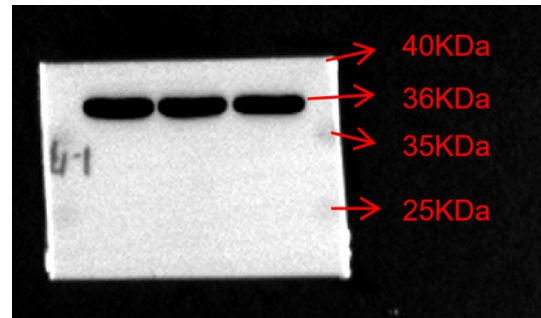

## Figure4A

1.LRCH4

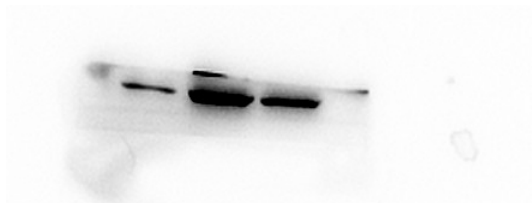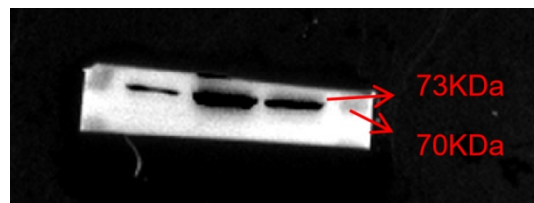

2.GSK3B

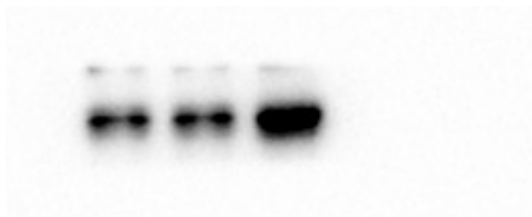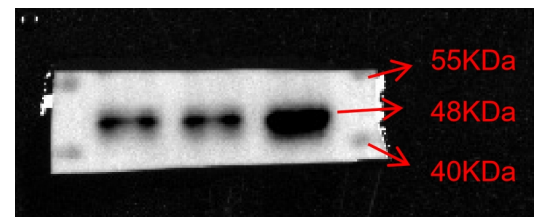

3.P-GSK3B

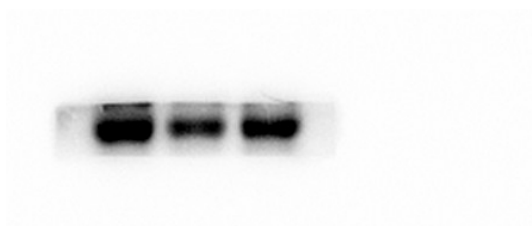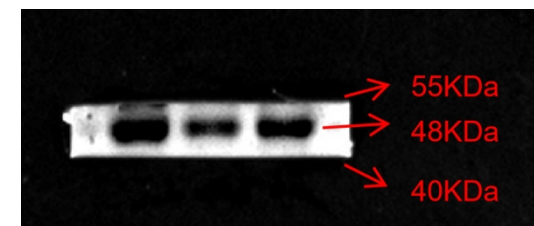

4.MEK

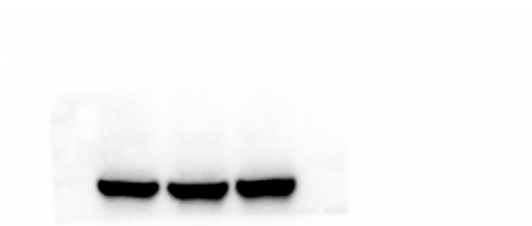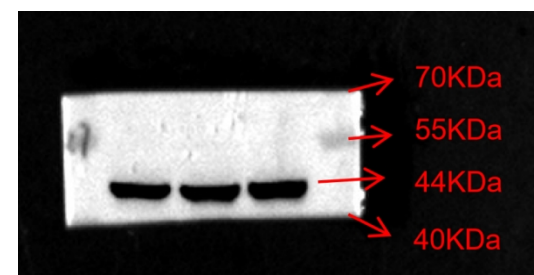

5.P-MEK

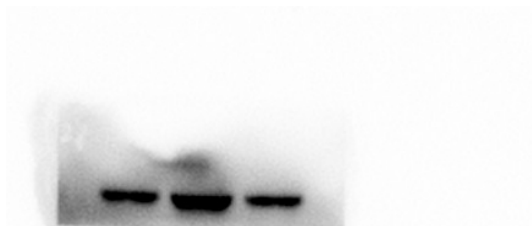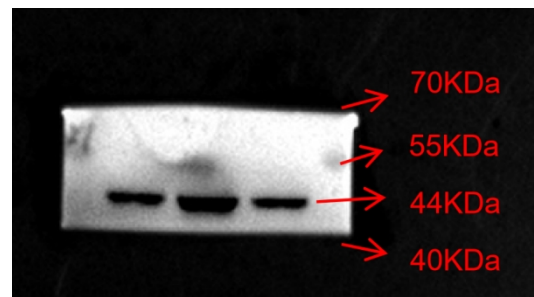

6.ERK

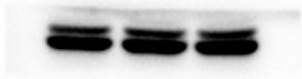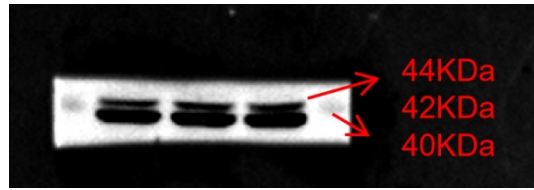

7.P-ERK

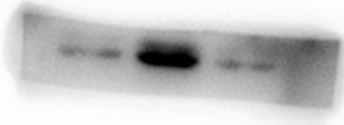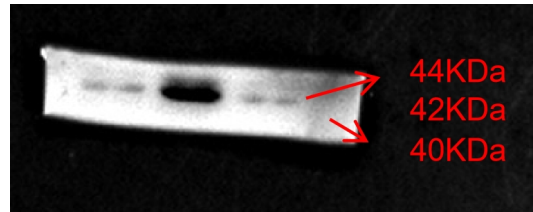

8.GAPDH

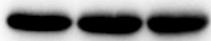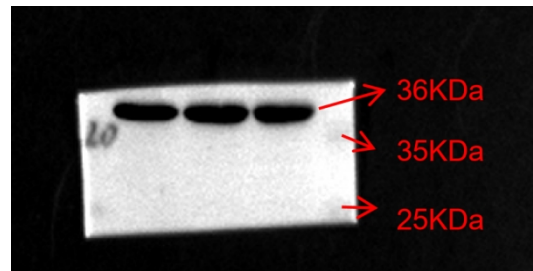

9.LRCH4

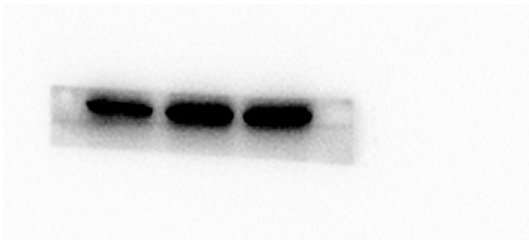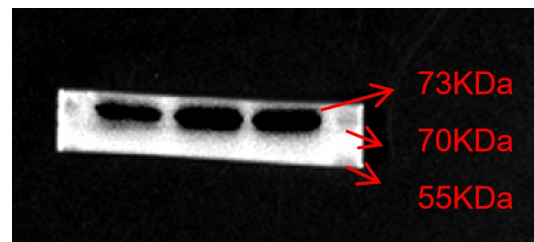

10.GSK3B

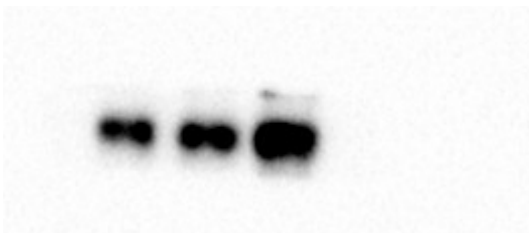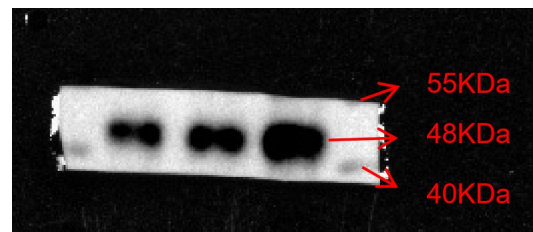

11.P-GSK3B

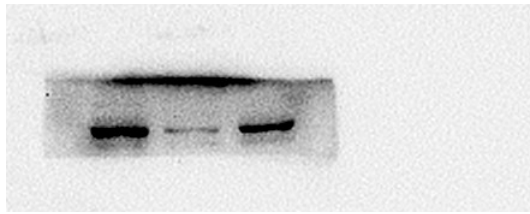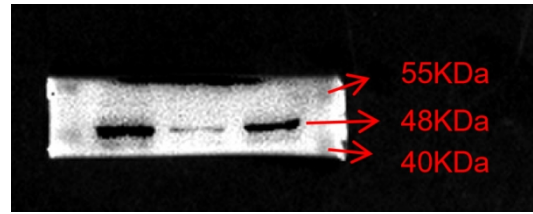

12.MEK

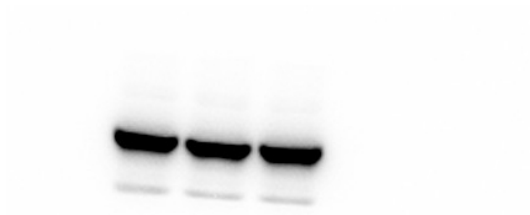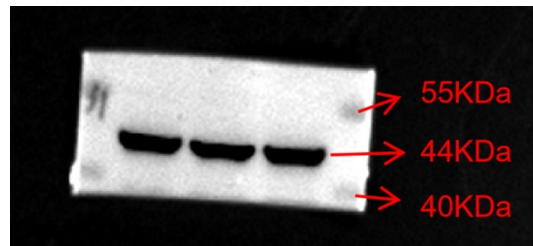

13.P-MEK

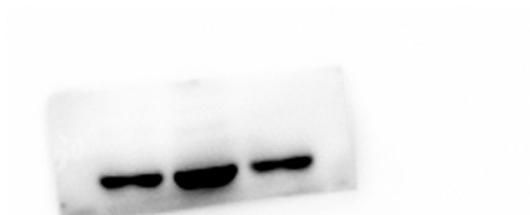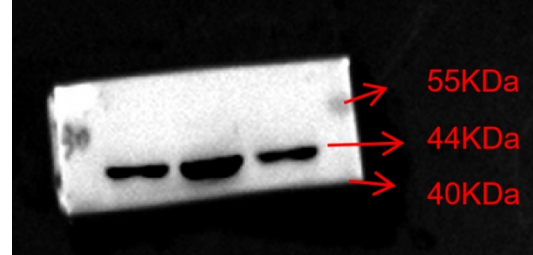

14.ERK

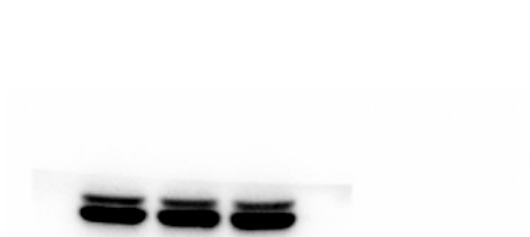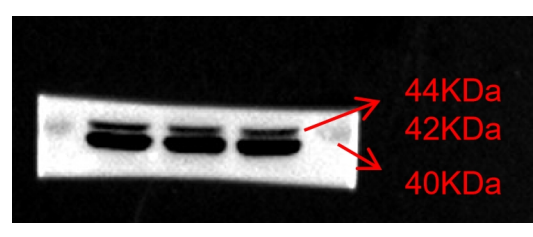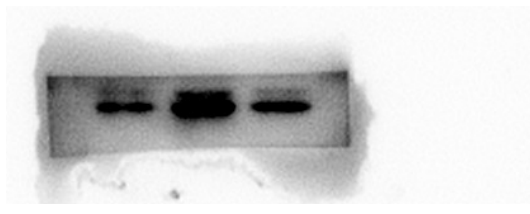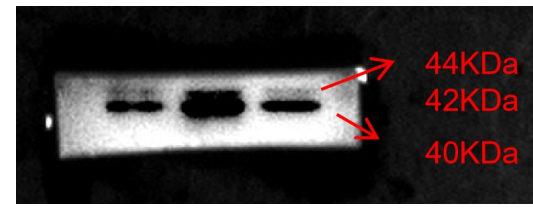

16.GAPDH

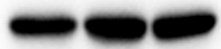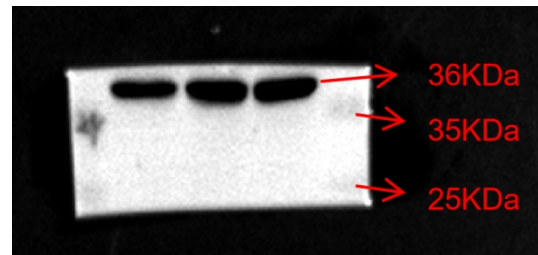

**Figure4B**

1.LRCH4

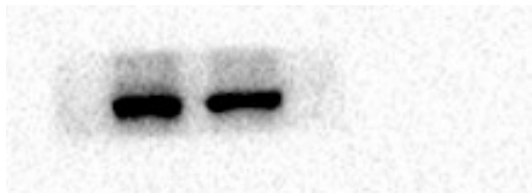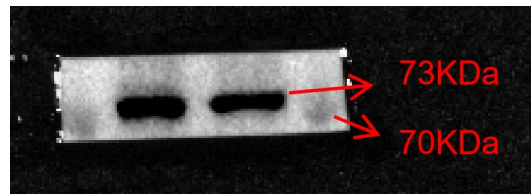

2.GSK3B

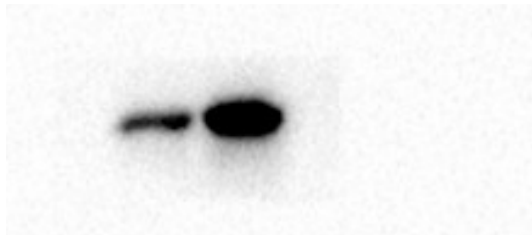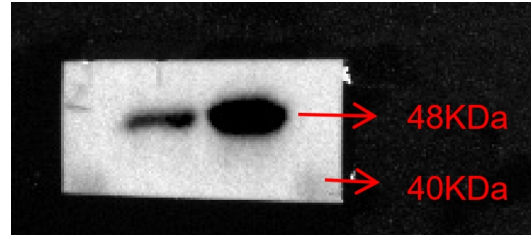

3.P-GSK3B

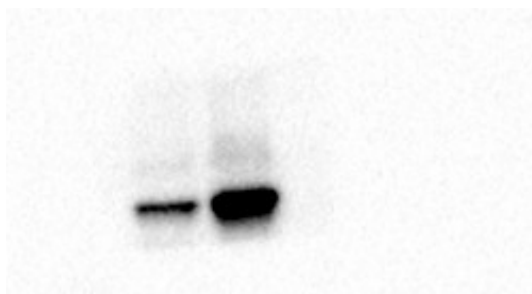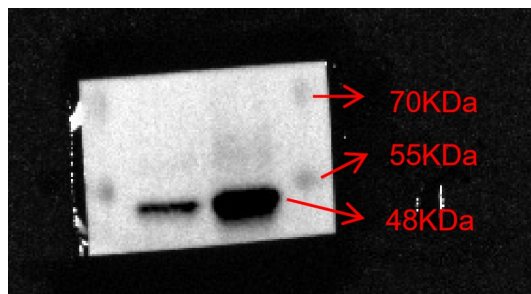

4.GAPDH

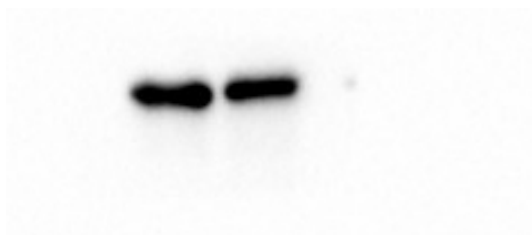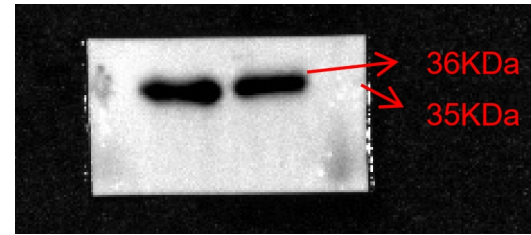

5.LRCH4

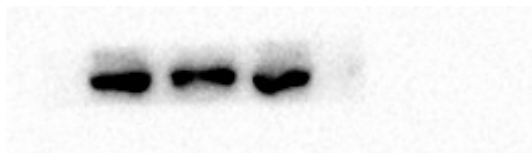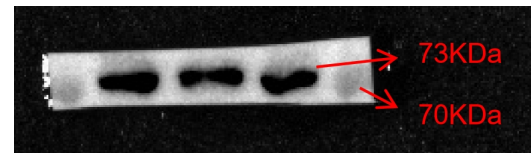

6.GSK3B

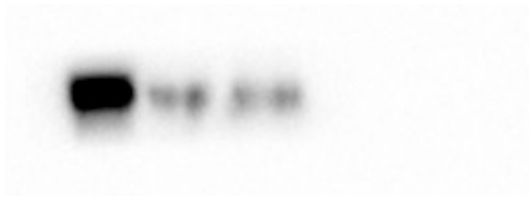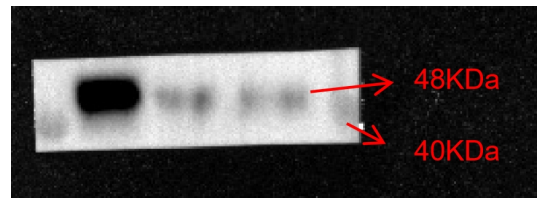

7.P-GSK3B

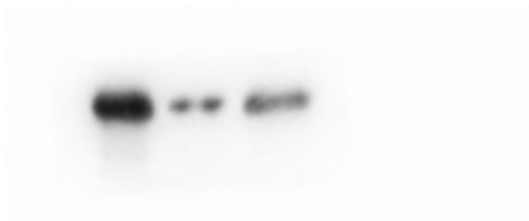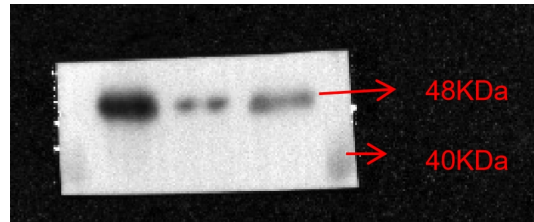

8.GAPDH

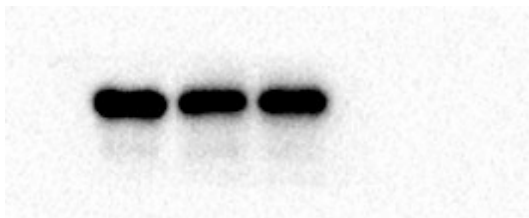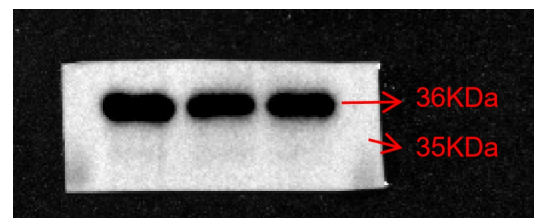

9.LRCH4

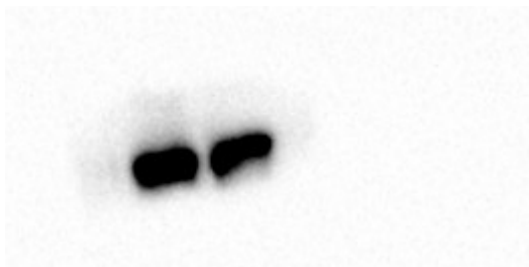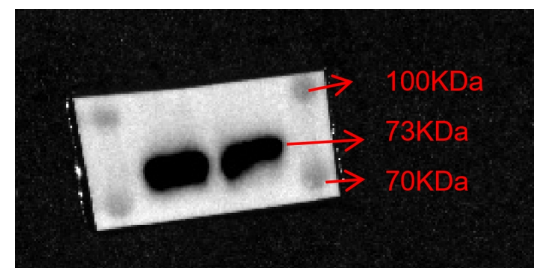

10.GSK3B

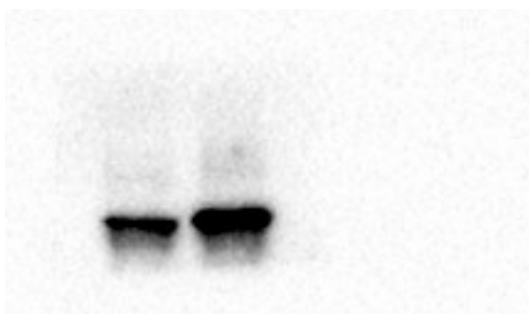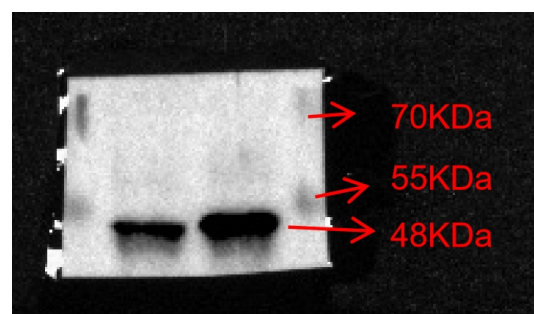

11.P-GSK3B

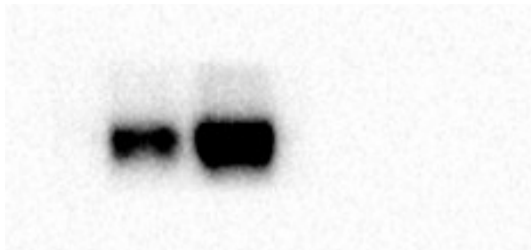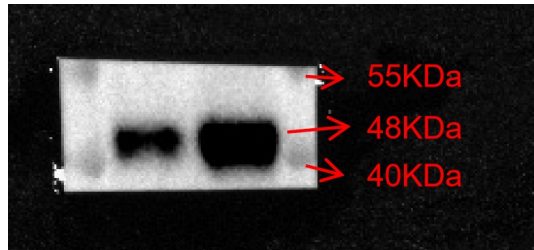

12.GAPDH

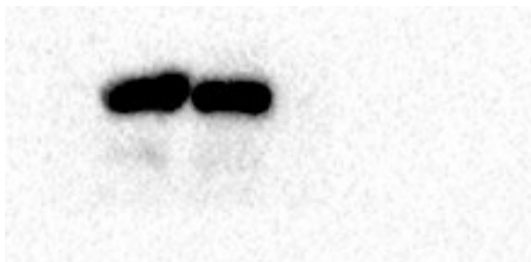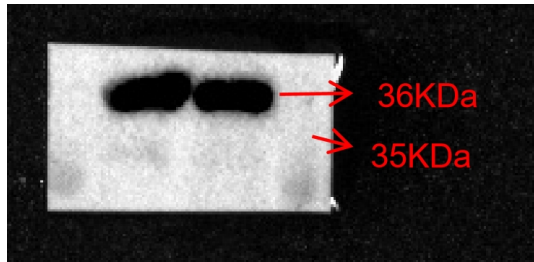

13.LRCH4

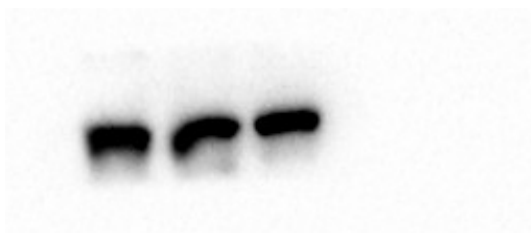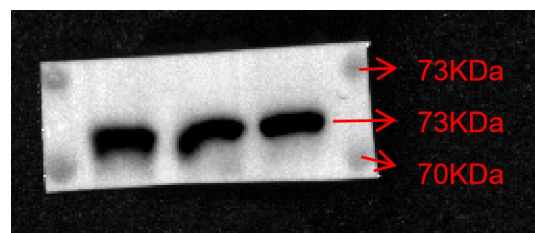

14.GSK3B

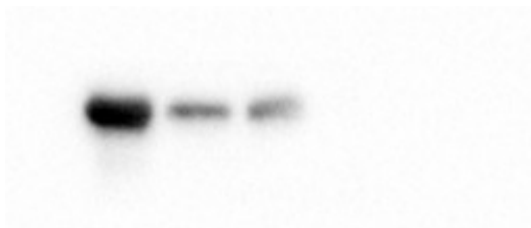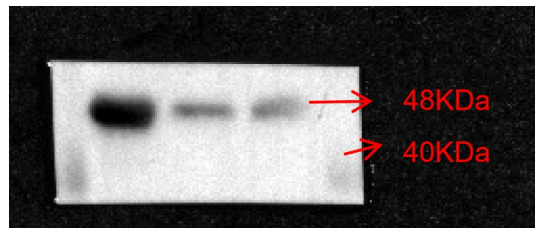

15.P-GSK3B

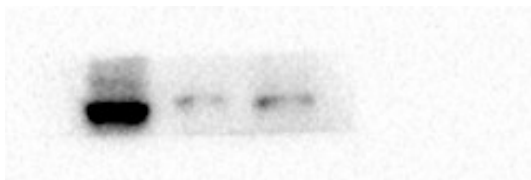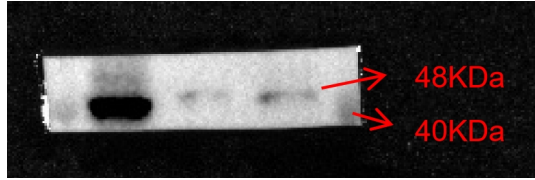

16.GAPDH

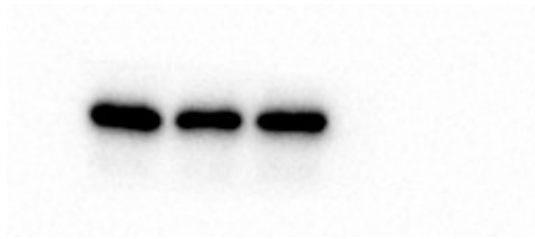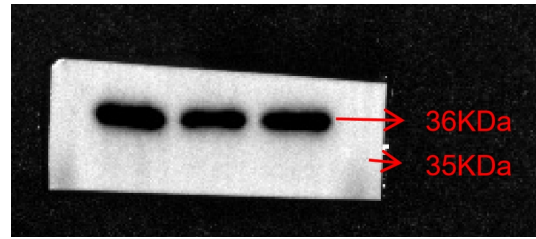

Supplement: Supplementary file 1 [file 1a2788b676b8d2821001b005.pdf]
